# Supplementary material for: B-Cell Epitope Mapping of the Plasmodium falciparum Malaria Vaccine Candidate GMZ2.6c in a Naturally Exposed Population of the Brazilian Amazon
Source: MDPI journal article supplement (doi:10.3390/vaccines11020446), 2023-02-15
Supplement: s1 [file s1]

**Table S1: IgG reactivity indeces for GLURP, MSP-3 and Pfs48/45 recombinant proteins.**

| Sample | IgG reactivity index |       |          |
|--------|----------------------|-------|----------|
|        | GLURP                | MSP-3 | Pfs48/45 |
| CZS 1  | 1.203                | 1.109 | 0.885    |
| CZS 4  | 1.100                | 1.100 | 0.513    |
| CZS 5  | 1.817                | 1.105 | 1.100    |
| CZS 6  | 1.269                | 0.835 | 0.947    |
| CZS 7  | 1.100                | 1.100 | 1.020    |
| CZS 8  | 1.329                | 1.134 | 1.119    |
| CZS 10 | 5.042                | 3.044 | 1.400    |
| CZS 11 | 1.813                | 1.200 | 1.100    |
| CZS 12 | 3.175                | 1.204 | 0.684    |
| CZS 13 | 11.018               | 1.866 | 2.582    |
| CZS 14 | 8.804                | 1.356 | 1.222    |
| CZS 15 | 3.529                | 1.743 | 1.100    |
| CZS 17 | 1.094                | 1.188 | 1.273    |
| CZS 18 | 1.451                | 0.825 | 0.877    |
| CZS 19 | 1.100                | 0.708 | 0.518    |
| CZS 20 | 0.614                | 1.003 | 0.677    |
| CZS 21 | 0.588                | 0.775 | 1.005    |
| CZS 22 | 11.555               | 1.419 | 1.550    |
| CZS 23 | 3.130                | 1.100 | 0.466    |
| CZS 24 | 4.517                | 1.100 | 0.546    |
| CZS 26 | 15.617               | 2.817 | 1.100    |
| CZS 27 | 4.119                | 1.630 | 0.528    |
| CZS 28 | 3.001                | 0.534 | 1.005    |
| CZS 29 | 0.954                | 1.149 | 0.936    |
| CZS 30 | 0.703                | 1.006 | 0.505    |
| CZS 31 | 0.950                | 0.869 | 1.101    |
| CZS 32 | 8.949                | 1.278 | 0.619    |
| CZS 33 | 1.174                | 1.227 | 1.006    |
| CZS 34 | 1.399                | 1.009 | 0.796    |
| CZS 35 | 1.488                | 0.537 | 0.606    |
| CZS 36 | 1.566                | 0.719 | 0.744    |
| CZS 37 | 1.488                | 0.775 | 0.817    |
| CZS 38 | 1.126                | 0.584 | 0.885    |
| CZS 39 | 1.100                | 1.100 | 0.772    |
| CZS 40 | 1.010                | 0.512 | 1.100    |
| CZS 41 | 1.088                | 0.635 | 0.823    |
| CZS 42 | 0.503                | 1.482 | 0.690    |
| CZS 43 | 1.122                | 1.162 | 1.008    |
| CZS 44 | 2.088                | 7.742 | 0.852    |
| CZS 45 | 3.078                | 0.890 | 0.658    |
| CZS 46 | 2.012                | 0.540 | 1.152    |
| CZS 48 | 3.669                | 7.040 | 1.006    |
| CZS 49 | 1.521                | 0.614 | 1.039    |
| CZS 50 | 1.078                | 1.914 | 0.940    |
| CZS 51 | 13.200               | 1.489 | 1.057    |
| CZS 52 | 1.100                | 1.100 | 1.100    |
| CZS 53 | 0.914                | 1.131 | 0.947    |
| CZS 54 | 2.846                | 1.440 | 1.368    |
| CZS 55 | 0.854                | 0.697 | 1.004    |

|         |        |       |       |
|---------|--------|-------|-------|
| CZS 56  | 1.844  | 0.829 | 0.535 |
| CZS 57  | 1.100  | 0.658 | 0.885 |
| CZS 58  | 1.070  | 1.400 | 0.951 |
| CZS 62  | 0.910  | 1.139 | 0.863 |
| CZS 63  | 0.810  | 1.070 | 0.874 |
| CZS 64  | 0.754  | 1.250 | 0.700 |
| CZS 66  | 5.280  | 1.286 | 0.885 |
| CZS 67  | 1.076  | 0.886 | 0.693 |
| CZS 69  | 0.797  | 1.200 | 1.288 |
| CZS 70  | 2.263  | 1.509 | 0.724 |
| CZS 71  | 2.077  | 1.156 | 0.626 |
| CZS 72  | 2.440  | 0.903 | 0.701 |
| CZS 75  | 0.923  | 1.117 | 1.500 |
| CZS 76  | 1.100  | 1.393 | 0.759 |
| CZS 78  | 1.173  | 0.899 | 0.663 |
| CZS 79  | 2.285  | 1.382 | 1.033 |
| CZS 80  | 1.100  | 2.191 | 0.641 |
| CZS 81  | 4.963  | 3.441 | 1.652 |
| CZS 82  | 1.751  | 0.952 | 0.896 |
| CZS 83  | 0.785  | 1.100 | 1.100 |
| CZS 84  | 3.548  | 1.011 | 0.481 |
| CZS 85  | 16.281 | 7.819 | 1.910 |
| CZS 86  | 14.752 | 3.990 | 1.550 |
| CZS 87  | 1.100  | 1.007 | 0.834 |
| CZS 88  | 3.457  | 1.002 | 0.471 |
| CZS 89  | 1.100  | 1.238 | 1.440 |
| CZS 90  | 1.010  | 1.007 | 1.520 |
| CZS 92  | 1.100  | 1.700 | 1.100 |
| CZS 95  | 1.053  | 1.090 | 0.708 |
| CZS 96  | 1.583  | 1.073 | 1.100 |
| CZS 98  | 1.389  | 0.677 | 0.771 |
| CZS 99  | 0.956  | 1.732 | 0.497 |
| CZS 100 | 0.999  | 1.271 | 0.787 |
| CZS 101 | 1.179  | 1.574 | 1.003 |
| CZS 102 | 1.251  | 1.500 | 1.100 |
| CZS 103 | 6.957  | 1.640 | 0.359 |
| CZS 104 | 2.324  | 1.100 | 1.930 |
| CZS 105 | 12.947 | 1.100 | 3.086 |
| CZS 106 | 0.641  | 1.100 | 0.490 |
| CZS 109 | 1.091  | 1.128 | 1.360 |
| CZS 110 | 3.372  | 1.100 | 1.130 |
| CZS 111 | 0.476  | 1.100 | 1.100 |
| CZS 112 | 1.198  | 1.210 | 0.662 |
| CZS 113 | 1.395  | 1.100 | 0.350 |
| CZS 117 | 2.125  | 2.360 | 1.033 |
| CZS 118 | 0.946  | 1.370 | 0.795 |
| CZS 119 | 1.064  | 0.969 | 0.724 |
| CZS 120 | 0.999  | 1.200 | 0.658 |
| CZS 121 | 0.454  | 0.564 | 1.100 |
| CZS 122 | 1.100  | 1.100 | 1.100 |
| CZS 123 | 1.172  | 1.118 | 0.383 |
| CZS 125 | 1.199  | 0.479 | 0.542 |
| CZS 126 | 1.022  | 0.551 | 0.514 |
| CZS 128 | 1.831  | 0.807 | 0.646 |

|         |       |       |       |
|---------|-------|-------|-------|
| CZS 130 | 1.226 | 0.487 | 0.570 |
| CZS 131 | 1.145 | 0.531 | 0.722 |
| CZS 132 | 5.059 | 1.649 | 1.212 |
| CZS 136 | 1.067 | 0.611 | 0.797 |
| CZS 137 | 1.094 | 0.451 | 0.604 |
| CZS 138 | 2.471 | 0.751 | 0.809 |
| CZS 143 | 1.323 | 1.100 | 0.727 |
| CZS 149 | 7.151 | 5.918 | 1.168 |
| CZS 151 | 1.199 | 0.787 | 0.606 |
| CZS 153 | 3.971 | 2.777 | 2.166 |
| CZS 154 | 2.206 | 1.446 | 1.328 |
| CZS 156 | 1.195 | 0.835 | 0.887 |
| CZS 157 | 0.746 | 0.898 | 1.077 |
| CZS 161 | 1.016 | 1.046 | 0.557 |
| CZS 164 | 2.772 | 4.611 | 0.760 |
| CZS 165 | 1.205 | 0.826 | 0.800 |
| CZS 166 | 0.960 | 1.069 | 0.745 |
| CZS 167 | 0.914 | 1.019 | 1.002 |
| CZS 168 | 4.577 | 4.028 | 1.100 |
| CZS 170 | 1.100 | 0.709 | 0.633 |
| CZS 172 | 1.366 | 1.167 | 0.736 |
| CZS 173 | 1.360 | 1.100 | 0.667 |
| CZS 174 | 1.118 | 0.691 | 0.698 |
| CZS 178 | 1.100 | 1.145 | 0.517 |
| CZS 179 | 1.295 | 0.938 | 0.907 |
| CZS 180 | 1.168 | 0.934 | 0.905 |
| CZS 182 | 1.100 | 0.880 | 1.023 |
| CZS 183 | 1.100 | 0.718 | 0.798 |
| CZS 184 | 1.217 | 1.652 | 0.725 |
| CZS 185 | 1.685 | 0.804 | 0.631 |
| CZS 186 | 2.877 | 0.880 | 0.885 |
| CZS 189 | 1.100 | 0.898 | 0.747 |
| CZS 190 | 1.146 | 1.881 | 0.642 |
| CZS 191 | 5.968 | 3.655 | 0.756 |
| CZS 192 | 1.152 | 0.880 | 0.720 |
| CZS 193 | 1.121 | 0.759 | 0.557 |
| CZS 194 | 1.100 | 0.835 | 0.747 |
| CZS 195 | 1.038 | 0.893 | 0.559 |
| CZS 196 | 1.027 | 1.474 | 1.507 |
| CZS 197 | 1.100 | 0.767 | 0.752 |
| CZS 198 | 1.129 | 1.564 | 0.765 |
| CZS 199 | 2.815 | 1.653 | 0.657 |
| CZS 200 | 1.036 | 0.737 | 0.577 |
| CZS 201 | 1.394 | 1.012 | 0.840 |
| CZS 202 | 1.100 | 0.929 | 0.845 |
| ML 1    | 1.132 | 0.665 | 0.601 |
| ML 2    | 1.016 | 0.725 | 0.626 |
| ML 3    | 1.049 | 0.936 | 0.806 |
| ML 5    | 1.316 | 0.613 | 0.454 |
| ML 6    | 1.100 | 1.100 | 1.006 |
| ML 7    | 0.576 | 1.100 | 1.100 |
| ML 8    | 6.524 | 0.765 | 1.045 |
| ML 10   | 1.321 | 0.955 | 1.100 |
| ML 13   | 2.751 | 1.123 | 1.100 |

|       |        |       |       |
|-------|--------|-------|-------|
| ML 15 | 1.100  | 0.867 | 0.806 |
| ML 17 | 0.931  | 1.069 | 1.100 |
| ML 18 | 1.009  | 0.658 | 0.768 |
| ML 22 | 1.100  | 0.801 | 1.100 |
| ML 23 | 1.365  | 0.554 | 0.511 |
| ML 24 | 1.100  | 1.065 | 0.768 |
| ML 25 | 1.107  | 0.809 | 1.100 |
| ML 26 | 2.075  | 1.333 | 1.076 |
| ML 27 | 1.137  | 0.746 | 0.689 |
| ML 28 | 0.511  | 1.195 | 0.459 |
| ML 29 | 1.100  | 0.739 | 1.100 |
| ML 31 | 4.652  | 0.833 | 1.100 |
| ML 40 | 18.815 | 1.380 | 1.075 |
| ML 41 | 3.930  | 1.326 | 1.147 |
| ML 43 | 0.906  | 2.252 | 0.596 |
| ML 44 | 12.500 | 5.249 | 1.670 |
| ML 46 | 1.064  | 1.100 | 0.542 |
| ML 47 | 1.256  | 1.100 | 0.822 |
| ML 48 | 0.782  | 1.671 | 1.100 |
| ML 49 | 0.462  | 1.100 | 0.652 |
| ML 50 | 2.535  | 0.959 | 0.806 |
| ML 51 | 13.648 | 2.699 | 1.382 |
| ML 52 | 3.036  | 1.100 | 0.821 |
| ML 53 | 1.186  | 1.100 | 0.634 |
| ML 54 | 1.198  | 1.012 | 0.566 |
| ML 55 | 1.880  | 0.902 | 0.887 |
| ML 58 | 1.627  | 0.719 | 0.590 |
| ML 60 | 1.350  | 0.567 | 0.566 |
| ML 61 | 1.602  | 1.100 | 0.678 |
| ML 64 | 1.795  | 0.821 | 0.596 |
| ML 65 | 1.520  | 1.100 | 0.812 |
| ML 66 | 1.093  | 0.886 | 0.790 |
| ML 69 | 1.100  | 0.875 | 0.839 |
| ML 70 | 5.218  | 1.100 | 0.739 |
| ML 73 | 1.175  | 0.972 | 0.772 |
| ML 74 | 4.070  | 1.085 | 1.259 |
| ML 76 | 1.127  | 1.100 | 0.815 |
| ML 77 | 13.912 | 3.815 | 1.066 |
| ML 78 | 6.696  | 3.001 | 1.487 |
| ML 79 | 1.100  | 0.630 | 0.775 |
| ML 80 | 0.637  | 0.985 | 1.500 |
| ML 82 | 1.003  | 0.580 | 0.721 |
| ML 83 | 1.475  | 1.100 | 0.724 |
| ML 84 | 1.100  | 1.100 | 0.710 |
| ML 86 | 0.897  | 1.100 | 0.611 |
| ML 87 | 1.120  | 1.100 | 1.239 |
| ML 88 | 5.306  | 2.777 | 1.100 |
| ML 89 | 1.201  | 0.755 | 0.770 |
| ML 90 | 2.038  | 3.558 | 1.100 |
| ML 91 | 4.230  | 1.282 | 0.616 |
| ML 93 | 1.100  | 1.156 | 1.569 |
| ML 94 | 1.256  | 0.994 | 0.796 |
| ML 95 | 1.100  | 1.006 | 0.572 |
| ML 96 | 1.231  | 0.713 | 0.536 |

|        |        |       |       |
|--------|--------|-------|-------|
| ML 97  | 3.938  | 1.977 | 1.077 |
| ML 98  | 1.069  | 0.719 | 0.696 |
| ML 99  | 0.788  | 1.234 | 0.675 |
| ML 100 | 1.157  | 1.462 | 1.076 |
| ML 101 | 1.069  | 0.929 | 0.842 |
| ML 103 | 1.263  | 0.653 | 0.872 |
| ML 106 | 0.843  | 0.689 | 1.060 |
| ML 107 | 1.161  | 0.702 | 1.034 |
| ML 108 | 0.578  | 1.100 | 1.005 |
| ML 109 | 0.942  | 1.114 | 0.528 |
| ML 115 | 1.049  | 1.162 | 0.817 |
| ML 119 | 1.100  | 0.905 | 0.569 |
| ML 120 | 0.405  | 1.100 | 0.569 |
| ML 121 | 0.303  | 1.100 | 0.397 |
| ML 123 | 0.581  | 1.084 | 0.848 |
| ML 124 | 1.829  | 1.492 | 1.168 |
| GJ 1   | 10.220 | 3.330 | 1.698 |
| GJ 3   | 6.920  | 1.100 | 0.912 |
| GJ 4   | 1.183  | 0.645 | 0.688 |
| GJ 5   | 1.176  | 1.100 | 0.710 |
| GJ 6   | 1.016  | 0.592 | 0.761 |
| GJ 7   | 1.576  | 0.835 | 0.725 |
| GJ 8   | 5.844  | 1.130 | 0.725 |
| GJ 9   | 1.415  | 1.100 | 0.710 |
| GJ 10  | 9.775  | 1.100 | 0.860 |
| GJ 11  | 1.564  | 0.811 | 1.003 |
| GJ 12  | 1.475  | 0.611 | 0.772 |
| GJ 14  | 1.324  | 0.857 | 1.100 |
| GJ 15  | 1.009  | 0.948 | 0.801 |
| GJ 16  | 1.100  | 0.807 | 0.518 |
| GJ 19  | 1.100  | 0.770 | 0.767 |
| GJ 21  | 1.968  | 1.661 | 0.959 |
| GJ 22  | 1.212  | 0.683 | 0.737 |
| GJ 23  | 2.028  | 1.907 | 0.908 |
| GJ 24  | 1.020  | 0.652 | 0.710 |
| GJ 25  | 1.243  | 0.633 | 1.140 |
| GJ 26  | 1.188  | 1.237 | 0.707 |
| GJ 28  | 1.128  | 1.012 | 1.002 |
| GJ 29  | 1.628  | 1.100 | 0.719 |
| GJ 30  | 1.316  | 0.683 | 0.856 |
| GJ 31  | 1.100  | 0.626 | 0.730 |
| GJ 33  | 1.244  | 0.773 | 0.833 |
| GJ 34  | 1.003  | 0.616 | 0.851 |
| GJ 35  | 1.440  | 0.504 | 0.645 |
| GJ 36  | 1.096  | 0.502 | 0.749 |
| GJ 37  | 1.100  | 0.766 | 0.900 |
| GJ 38  | 2.008  | 1.180 | 0.774 |
| GJ 39  | 1.132  | 0.724 | 0.710 |
| GJ 40  | 0.852  | 0.759 | 1.030 |
| GJ 41  | 0.648  | 1.100 | 1.100 |
| GJ 42  | 1.120  | 1.003 | 0.829 |
| GJ 43  | 0.990  | 1.100 | 0.928 |
| GJ 44  | 1.591  | 1.100 | 1.100 |
| GJ 45  | 1.100  | 0.586 | 0.793 |

|        |        |       |       |
|--------|--------|-------|-------|
| GJ 46  | 1.001  | 0.588 | 0.957 |
| GJ 48  | 1.100  | 1.100 | 0.738 |
| GJ 49  | 1.100  | 0.542 | 1.005 |
| GJ 50  | 1.832  | 1.471 | 1.183 |
| GJ 51  | 1.100  | 1.292 | 1.540 |
| GJ 52  | 1.100  | 1.038 | 0.738 |
| GJ 53  | 1.100  | 0.647 | 0.599 |
| GJ 56  | 1.060  | 0.599 | 2.010 |
| GJ 57  | 1.496  | 0.891 | 0.781 |
| GJ 58  | 1.672  | 0.872 | 0.722 |
| GJ 59  | 1.876  | 0.641 | 0.769 |
| GJ 60  | 1.100  | 1.435 | 1.106 |
| GJ 61  | 2.550  | 0.891 | 1.100 |
| GJ 62  | 7.966  | 1.100 | 0.777 |
| GJ 63  | 1.488  | 0.579 | 0.797 |
| GJ 64  | 2.251  | 1.100 | 2.090 |
| GJ 65  | 1.596  | 0.744 | 0.743 |
| GJ 67  | 3.793  | 1.036 | 0.846 |
| GJ 70  | 1.197  | 0.663 | 1.220 |
| GJ 73  | 4.026  | 0.651 | 0.870 |
| GJ 75  | 0.855  | 0.747 | 1.002 |
| GJ 80  | 1.574  | 0.773 | 1.026 |
| GJ 81  | 1.039  | 1.100 | 0.724 |
| GJ 82  | 1.050  | 0.749 | 0.641 |
| GJ 83  | 1.007  | 0.912 | 0.757 |
| GJ 84  | 3.194  | 0.656 | 0.815 |
| GJ 85  | 2.160  | 1.608 | 1.508 |
| GJ 86  | 1.004  | 0.731 | 0.886 |
| GJ 87  | 29.853 | 9.374 | 3.393 |
| GJ 88  | 1.100  | 1.054 | 0.742 |
| GJ 90  | 1.212  | 1.966 | 1.141 |
| GJ 91  | 0.777  | 0.783 | 1.141 |
| GJ 94  | 1.115  | 0.608 | 0.624 |
| GJ 96  | 1.127  | 0.546 | 0.872 |
| GJ 97  | 0.958  | 0.799 | 1.241 |
| GJ 99  | 1.100  | 1.100 | 1.212 |
| GJ 100 | 1.106  | 0.855 | 0.918 |
| GJ 102 | 1.027  | 0.526 | 0.882 |

---

Reactivity Index value was considered to classify individuals as positive ( $> 1$ ) and negative ( $< 1$ ).
